# Supplementary material
Source: publisher figshare collection journal article supplement (https://karger.figshare.com/ndownloader/files/12833246)
Supplement: Supplementary file 1 [file 12833246]

Table S1

|  | Matched Comparison Cohort | | |  | Unmatched Compatison Chohrt | | |
| --- | --- | --- | --- | --- | --- | --- | --- |
|  | Adjusted HR | 95% CI | *p* value |  | Adjusted HR | 95% CI | *p* value |
| Sleep apnea (With *vs.* Without) | 0.939 | 0.652-5.557 | 0.825 |  | 2.245 | 0.934-5.397 | 0.071 |

HR = hazard ratio; CI = confidence interval; *p* values for the adjusted HRs. *Adjusted HR adjusted for variables listed in Table 3.
